# Supplementary material for: Yield Losses Caused by Barley Yellow Dwarf Virus-PAV Infection in Wheat and Barley: A Three-Year Field Study in South-Eastern Australia
Source: MDPI journal article supplement (doi:10.3390/microorganisms9030645), 2021-03-19
Supplement: s1 [file s1]

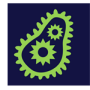

---

Supplementary Materials

# **Yield Losses Caused by Barley Yellow Dwarf Virus-PAV Infection in Wheat and Barley: A Three-Year Field Study in South-Eastern Australia**

Narelle Nancarrow <sup>1,\*</sup>, Mohammad Aftab <sup>1</sup>, Grant Hollaway <sup>1</sup>, Brendan Rodoni <sup>2,3</sup> and Piotr Trebicki <sup>1,4</sup>

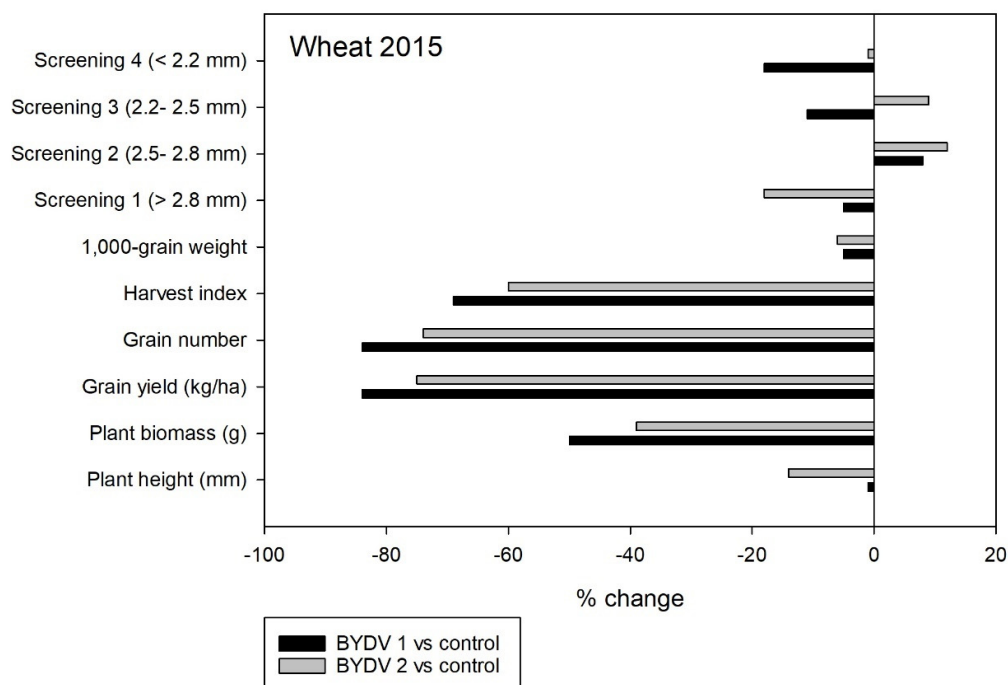

**Figure S5.** Percent change associated with early (BYDV 1) and later (BYDV 2) inoculation treatments in comparison to the control treatment for grain and plant parameters measured in wheat in experiment 1 (2015). See Table S1 for the *p*-values calculated according to Student's *t*-tests or ANOVA.

**Table 1.** *p*-Values calculated according to Student's *t*-tests or ANOVA for each comparison between the three treatments (BYDV-1, BYDV-2, and control) for each parameter measured in wheat in experiment 1 (2015). Screenings represent grain size, measured as the proportion of grain in each of the > 2.8 mm, 2.5–2.8 mm, 2.2–2.5 mm, and < 2.2 mm size ranges.

| Wheat 2015                                                                          |                       |                       |                      |
|-------------------------------------------------------------------------------------|-----------------------|-----------------------|----------------------|
|  | BYDV 1<br>vs. Control | BYDV 2<br>vs. Control | BYDV 1<br>vs. BYDV 2 |
|                                                                                     |                       |                       |                      |
| Screening 4 (<2.2 mm)                                                               | <i>p</i> = 0.88       | <i>p</i> = 0.9996     | <i>p</i> = 0.90      |
| Screening 3 (2.2–2.5 mm)                                                            | <i>p</i> = 0.94       | <i>p</i> = 0.95       | <i>p</i> = 0.80      |
| Screening 2 (2.5–2.8 mm)                                                            | <i>p</i> = 0.41       | <i>p</i> = 0.19       | <i>p</i> = 0.86      |
| Screening 1 (>2.8 mm)                                                               | <i>p</i> = 0.96       | <i>p</i> = 0.55       | <i>p</i> = 0.72      |
| 1000-grain weight                                                                   | <i>p</i> = 0.37       | <i>p</i> = 0.17       | <i>p</i> = 0.87      |
| Harvest index                                                                       | <i>p</i> < 0.001      | <i>p</i> < 0.001      | <i>p</i> = 0.72      |
| Grain number                                                                        | <i>p</i> < 0.001      | <i>p</i> < 0.001      | <i>p</i> = 0.54      |
| Grain yield (kg/ha)                                                                 | <i>p</i> < 0.001      | <i>p</i> < 0.001      | <i>p</i> = 0.61      |
| Plant biomass (g)                                                                   | <i>p</i> < 0.001      | <i>p</i> < 0.001      | <i>p</i> = 0.12      |
| Plant height (mm)                                                                   | <i>p</i> < 0.001      | <i>p</i> < 0.001      | <i>p</i> = 0.57      |

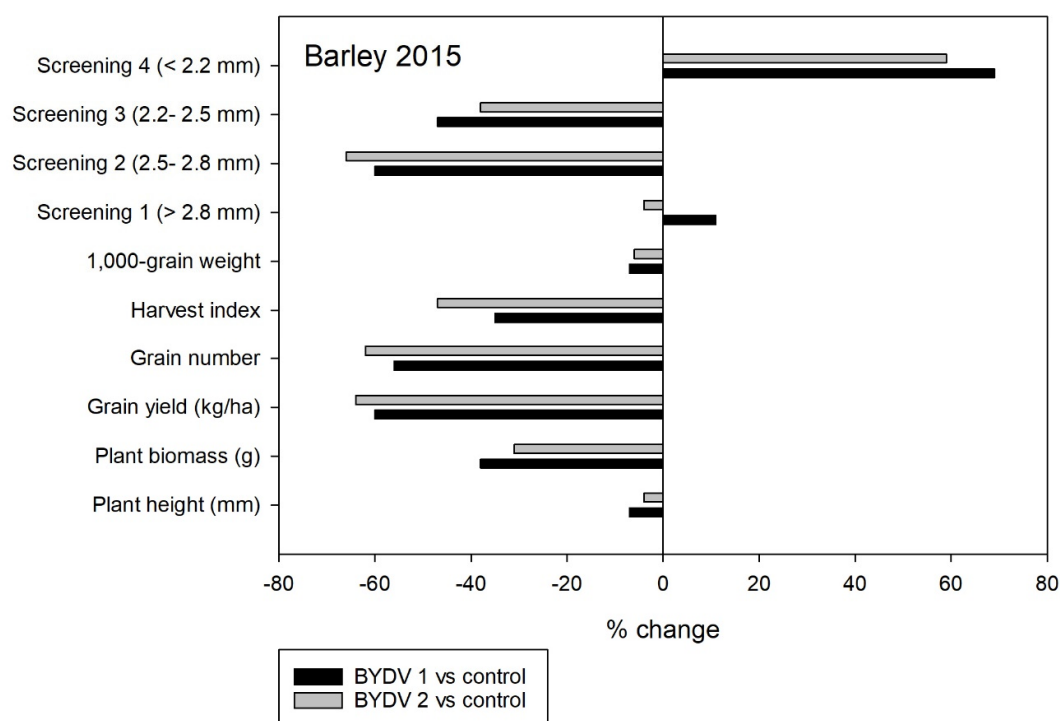

**Figure S6.** Percent change associated with early (BYDV 1) and later (BYDV 2) inoculation treatments in comparison to the control treatment for grain and plant parameters measured in barley in experiment 2 (2015). See Table S2 for the *p*-values calculated according to Student's *t*-tests or ANOVA.

**Table 2.** *p*-Values calculated according to Student's *t*-tests or ANOVA for each comparison between the three treatments (BYDV-1, BYDV-2, and control) for each parameter measured in barley in experiment 2 (2015). Screenings represent grain size which were measured as the proportion of grain in each of the > 2.8 mm, 2.5–2.8 mm, 2.2–2.5 mm, and < 2.2 mm size ranges.

| Barley 2015              | BYDV 1<br>vs. Control | BYDV 2<br>vs. Control | BYDV 1<br>vs. BYDV 2 |
|--------------------------|-----------------------|-----------------------|----------------------|
| Screening 4 (<2.2 mm)    | $p = 0.001$           | $p = 0.005$           | $p = 0.79$           |
| Screening 3 (2.2–2.5 mm) | $p < 0.001$           | $p = 0.005$           | $p = 0.66$           |
| Screening 2 (2.5–2.8 mm) | $p = 0.056$           | $p = 0.034$           | $p = 0.97$           |
| Screening 1 (>2.8 mm)    | $p = 0.82$            | $p = 0.97$            | $p = 0.68$           |
| 1000-grain weight        | $p = 0.057$           | $p = 0.17$            | $p = 0.17$           |
| Harvest index            | $p = 0.051$           | $p < 0.001$           | $p = 0.66$           |
| Grain number             | $p = 0.002$           | $p < 0.001$           | $p = 0.92$           |
| Grain yield (kg/ha)      | $p = 0.0014$          | $p < 0.001$           | $p = 0.94$           |
| Plant biomass (g)        | $p = 0.007$           | $p < 0.001$           | $p = 0.70$           |
| Plant height (mm)        | $p = 0.40$            | $p = 0.76$            | $p = 0.81$           |

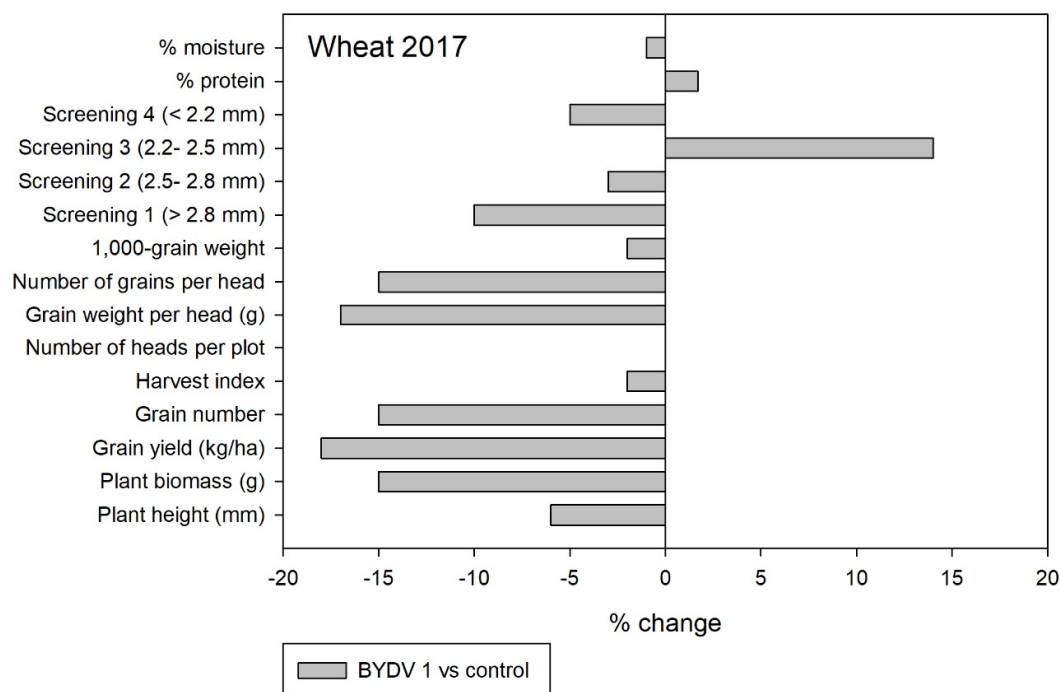

**Figure S7.** Percent change associated with early (BYDV 1) and later (BYDV 2) inoculation treatments in comparison to the control treatment for grain and plant parameters measured in wheat in experiment 3 (2017). See Table S3 for the *p*-values calculated according to Student's *t*-tests or ANOVA.

**Table 3.** *p*-Values calculated according to Student's *t*-tests or ANOVA for each comparison between the two treatments (BYDV 1 and control) for each parameter measured in wheat in experiment 3 (2017). Screenings represent grain size which were measured as the proportion of grain in each of the >2.8 mm, 2.5–2.8 mm, 2.2–2.5 mm, and <2.2 mm size ranges.

| Wheat 2017                    | BYDV<br>vs. Control |
|-------------------------------|---------------------|
| % moisture                    | <i>p</i> = 0.20     |
| % protein                     | <i>p</i> = 0.43     |
| Screening 4 (<2.2 mm)         | <i>p</i> = 0.80     |
| Screening 3 (2.2–2.5 mm)      | <i>p</i> = 0.08     |
| Screening 2 (2.5–2.8 mm)      | <i>p</i> = 0.62     |
| Screening 1 (>2.8 mm)         | <i>p</i> = 0.35     |
| 1000-grain weight             | <i>p</i> = 0.54     |
| Number of grains per head (g) | <i>p</i> = 0.009    |
| Grain weight per head (g)     | <i>p</i> = 0.035    |
| Number of heads per plot      | <i>p</i> = 0.99     |
| Harvest index                 | <i>p</i> = 0.35     |
| Grain number                  | <i>p</i> = 0.0499   |
| Grain yield (kg/ha)           | <i>p</i> = 0.056    |
| Plant biomass (g)             | <i>p</i> = 0.048    |
| Plant height (mm)             | <i>p</i> = 0.001    |

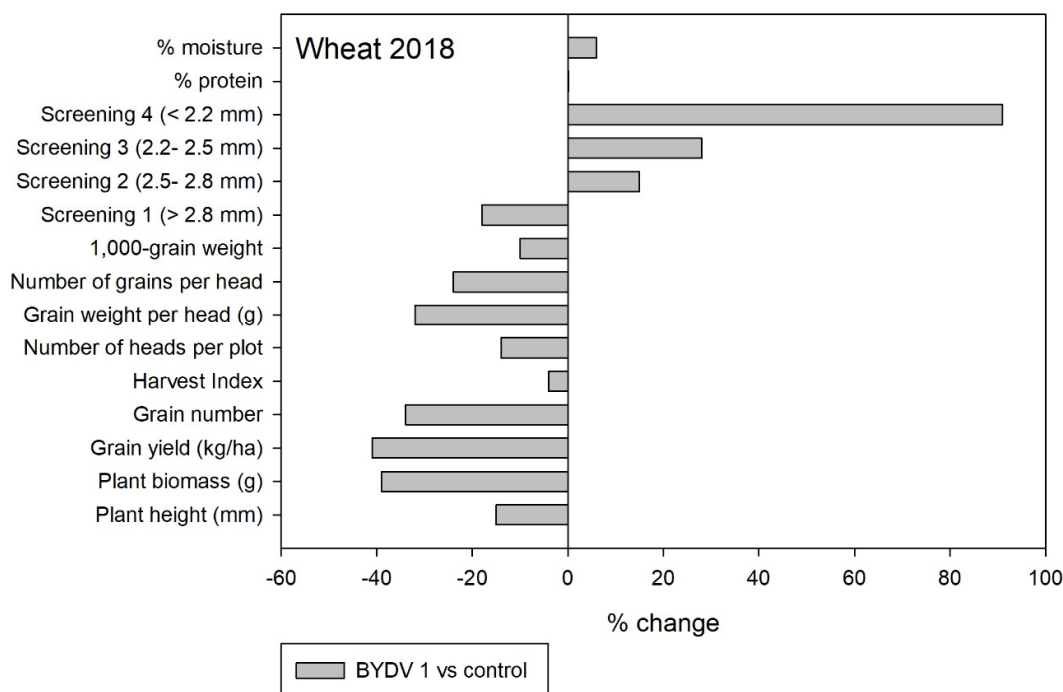

**Figure S8.** Percent change associated with early (BYDV 1) and later (BYDV 2) inoculation treatments in comparison to the control treatment for grain and plant parameters measured in wheat in experiment 4 (2018). See Table S4 for the *p*-values calculated according to Student's *t*-tests or ANOVA.

**Table 4.** *p*-Values calculated according to Student's *t*-tests or ANOVA for each comparison between the two treatments (BYDV 1 and control) for each parameter measured in wheat in experiment 4 (2018). Screenings represent grain size which were measured as the proportion of grain in each of the >2.8 mm, 2.5–2.8 mm, 2.2–2.5 mm, and <2.2 mm size ranges.

| Wheat 2018                    | BYDV<br>vs. Control |
|-------------------------------|---------------------|
| % moisture                    | <i>p</i> = 0.81     |
| % protein                     | <i>p</i> = 0.070    |
| Screening 4 (<2.2 mm)         | <i>p</i> = 0.045    |
| Screening 3 (2.2–2.5 mm)      | <i>p</i> = 0.17     |
| Screening 2 (2.5–2.8 mm)      | <i>p</i> = 0.038    |
| Screening 1 (>2.8 mm)         | <i>p</i> = 0.036    |
| 1000-grain weight             | <i>p</i> < 0.001    |
| Number of grains per head (g) | <i>p</i> = 0.0043   |
| Grain weight per head (g)     | <i>p</i> < 0.001    |
| Number of heads per plot      | <i>p</i> = 0.15     |
| Harvest index                 | <i>p</i> = 0.16     |
| Grain number                  | <i>p</i> = 0.013    |
| Grain yield (kg/ha)           | <i>p</i> = 0.005    |
| Plant biomass (g)             | <i>p</i> = 0.004    |
| Plant height (mm)             | <i>p</i> < 0.001    |
